# Supplementary material for: Long noncoding RNA AC092171.4 promotes hepatocellular carcinoma progression by sponging microRNA-1271 and upregulating GRB2
Source: publisher site journal article supplement (doi:10.18632/aging.103419), 2020-07-21
Supplement: Supplementary file [file aging-v12i14-103419-supplementary-material-SD1.pdf]

## SUPPLEMENTARY FIGURE

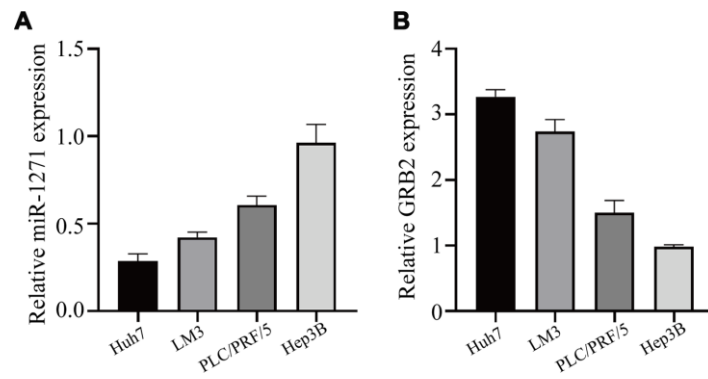

**Supplementary Figure 1. MiR-1271 and GRB2 expression in HCC cells.** (A, B) QRT-PCR analysis of (A) miR-1271 and (B) GRB2 levels in HCC cell lines, Huh7, LM3, PLC/PRF/5 and Hep3B.
