# Supplementary material for: Long noncoding RNA AC092171.4 promotes hepatocellular carcinoma progression by sponging microRNA-1271 and upregulating GRB2
Source: Aging (Albany NY). 2020 Jul 21;12(14):14141–56. doi: 10.18632/aging.103419 (PMC7425487; doi:10.18632/aging.103419)
Supplement: Supplementary Table 1 [file aging-12-103419-s001..xls]

## Sheet: Sheet2
Sample	Sex	Age	TNM（0=I，II，1=III，IV）	PVTT（0=Absence；1=Presence）	HBV（0=Absence；1=Presence）	Tumor number	Tumor size(0=<5cm;1=>5cm)	AFP	Differentiation grade （0=well；1=poor）	Overall survival	Overall survival months	Recunrrence	Recunrrence months	AC092171.4 exprssion
1	Male	55	1	0	1	1	6.2	652	1	1	23	1	23	1
2	Male	48	0	0	1	1	2.2	191	0	0	5	0	5	0
3	Male	30	0	1	1	2	7	95	0	1	5	1	2	1
4	Male	60	0	0	1	1	3.5	33	0	1	15	1	3	1
5	Male	34	0	0	1	1	3.8	161	0	0	20	0	20	1
6	Male	46	1	0	0	1	3	115	1	0	49	0	49	0
7	Male	50	0	0	1	1	1	125	1	0	49	0	49	0
8	Male	53	0	0	1	1	1	330	0	0	7	0	7	1
9	Male	54	0	0	0	1	3.2	70	0	0	38	0	38	0
10	Male	56	0	0	1	1	2	208	0	0	38	0	38	1
11	Female	48	1	1	0	2	5.5	209	1	0	38	0	38	0
12	Male	43	0	0	1	3	2	709	1	0	38	0	38	1
13	Male	59	0	1	1	3	5.8	110	1	1	38	1	24	1
14	Male	60	0	0	1	1	1	117	0	0	38	0	38	1
15	Male	56	0	0	0	1	4.6	62	0	0	38	0	38	1
16	Male	44	1	1	1	2	7	541	1	1	1	1	1	1
17	Female	47	1	0	0	1	2.5	129	0	0	38	1	25	0
18	Male	45	0	0	1	1	2	74	1	0	38	0	38	0
19	Male	44	0	0	0	1	4.2	48	0	0	29	0	29	0
20	Female	55	1	0	0	2	6	38	0	0	38	0	33	0
21	Male	39	1	1	0	1	7.5	128	0	0	38	0	38	0
22	Male	46	0	0	1	2	5.3	43	0	1	38	1	34	0
23	Male	40	0	0	1	3	8	693	0	0	37	1	37	1
24	Male	37	1	0	0	3	8.2	8092	1	0	37	0	37	1
25	Male	58	1	1	1	3	10.5	244	0	1	37	1	10	1
26	Male	58	0	0	1	1	6	60	1	1	37	1	26	1
27	Male	56	0	0	1	1	6.8	107	0	1	25	1	25	1
28	Male	59	0	0	0	1	6	606	0	1	25	1	25	1
29	Male	50	1	0	0	4	7	437	1	1	11	1	6	1
30	Male	55	0	0	1	1	6	315	1	0	37	0	37	1
31	Male	53	1	0	1	1	4	152	0	0	14	0	14	0
32	Male	45	1	1	1	1	3	473	1	1	15	1	15	0
33	Male	52	1	1	1	2	4.5	86	1	1	8	1	1	1
34	Male	33	0	1	1	2	6.5	138	0	0	36	0	36	1
35	Male	37	0	0	1	1	3.5	363	0	0	20	0	8	0
36	Male	45	0	0	1	1	6.6	82	0	0	36	0	36	0
37	Male	51	0	0	1	2	6.4	176	0	1	18	1	18	1
38	Male	48	0	0	0	1	1.8	97	0	0	36	0	36	0
39	Male	58	1	1	1	3	8	964	1	1	1	1	1	1
40	Male	34	1	1	0	1	5	363	1	1	2	1	1	1
41	Male	52	1	1	0	2	4.4	164	1	1	13	1	13	1
42	Male	33	1	0	0	1	9.4	412	1	0	35	0	35	1
43	Male	38	0	1	0	2	9	866	0	1	23	1	7	1
44	Male	50	0	0	1	1	5.6	510	0	0	48	0	48	1
45	Male	53	0	0	0	1	2	150	0	0	34	0	34	0
46	Male	50	0	0	1	1	4	81	0	0	34	0	34	0
47	Male	43	0	0	1	1	2.8	162	0	0	7	0	7	1
48	Male	33	0	0	0	1	4	132	0	0	20	0	32	0
49	Male	34	1	0	0	3	7	834	1	1	4	1	1	0
50	Male	48	1	0	0	1	5.2	51	0	0	11	1	7	1
51	Female	50	0	0	0	1	5.6	153	0	0	60	0	60	0
52	Male	50	1	1	1	3	7.5	362	1	0	6	1	4	0
53	Female	51	1	0	1	1	5	182	0	0	60	0	60	0
54	Female	45	0	0	1	1	2.3	877	0	0	58	0	58	0
55	Male	60	0	1	0	3	6.4	350	0	0	60	0	60	1
56	Male	36	1	0	0	3	3.7	328	0	0	50	0	50	1
57	Male	36	0	0	0	1	1.9	956	0	1	4	1	4	0
58	Male	32	0	0	0	1	2.3	134	0	0	33	0	33	0
59	Male	36	0	0	1	1	3	154	1	0	58	0	58	0
60	Male	38	0	0	0	3	1	97	0	0	15	0	15	1
61	Female	58	0	1	0	3	6.3	756	0	0	58	0	58	1
62	Male	45	0	0	0	1	1	195	0	1	1	0	1	0
63	Male	34	1	0	1	1	7	183	1	1	49	1	49	0
64	Male	53	0	0	1	2	1	15039	0	0	48	0	48	0
65	Female	34	1	1	0	3	5	473	0	1	8	1	4	1
66	Male	38	0	0	1	1	1.5	41	0	0	48	0	48	0
67	Male	55	1	1	1	1	9	156	0	1	0	0	0	1
68	Female	53	1	0	0	1	4	97	0	0	34	0	34	0
69	Female	56	1	1	1	2	5.5	535	0	1	4	1	4	1
70	Male	59	1	1	0	3	11	410	0	1	6	1	6	1
71	Male	36	0	0	1	1	1	729	0	0	33	0	33	0
72	Male	35	1	1	0	2	4.5	67	0	0	33	0	33	0
73	Male	55	0	0	0	1	2	79	0	0	23	0	23	0
74	Male	37	1	1	1	3	4.5	690	1	1	0	0	0	0
75	Male	37	1	1	0	2	5	401	1	1	28	1	28	1
76	Male	49	1	1	0	3	6	475	1	1	4	1	4	1
77	Male	52	1	1	1	2	4.8	633	1	0	26	0	26	1
78	Male	51	1	0	1	1	5	490	1	1	26	1	26	1
79	Female	50	1	1	1	1	6.5	632	1	1	13	1	13	1
80	Male	44	1	0	1	1	0.8	951	0	1	25	1	25	1
81	Female	37	1	1	0	1	6	170	0	0	25	0	25	1
82	Male	52	1	1	0	2	1	241	1	0	14	0	14	1
83	Female	55	0	0	1	1	3	175	0	0	23	0	23	0
84	Male	60	0	0	0	1	2.7	368	0	1	23	0	23	1
85	Male	53	1	0	0	2	5.3	91	0	1	9	1	9	1
86	Male	31	0	0	1	1	1	977	0	1	14	1	2	1
87	Male	41	1	1	1	1	5	907	0	1	9	1	3	1
88	Male	60	1	0	0	4	8.2	880	0	1	16	1	1	1
89	Male	33	0	0	1	1	2.5	178	0	1	27	1	16	0
90	Female	52	0	0	0	1	4	70	0	0	15	0	15	0
91	Male	51	1	1	1	3	1.8	34	0	1	15	1	15	0
92	Male	55	0	0	1	1	3	134	0	1	10	1	10	1
93	Male	59	1	0	1	2	2.6	135	0	0	15	0	15	0
94	Male	33	1	0	1	1	7	414	1	1	15	1	4	1
95	Male	33	0	0	1	1	7.2	980	1	1	15	1	15	0
